# Supplementary material
Source: ML conference proceedings conference paper supplement (https://openaccess.thecvf.com/content/CVPR2026/html/Peng_Towards_Holistic_Modeling_CVPR_2026_paper.html)
Supplement: Supplementary file 1 [file Peng_Towards_Holistic_Modeling_CVPR_2026_supplemental.pdf]

# Towards Holistic Modeling for Video Frame Interpolation with Auto-regressive Diffusion Transformers

## Supplementary Material

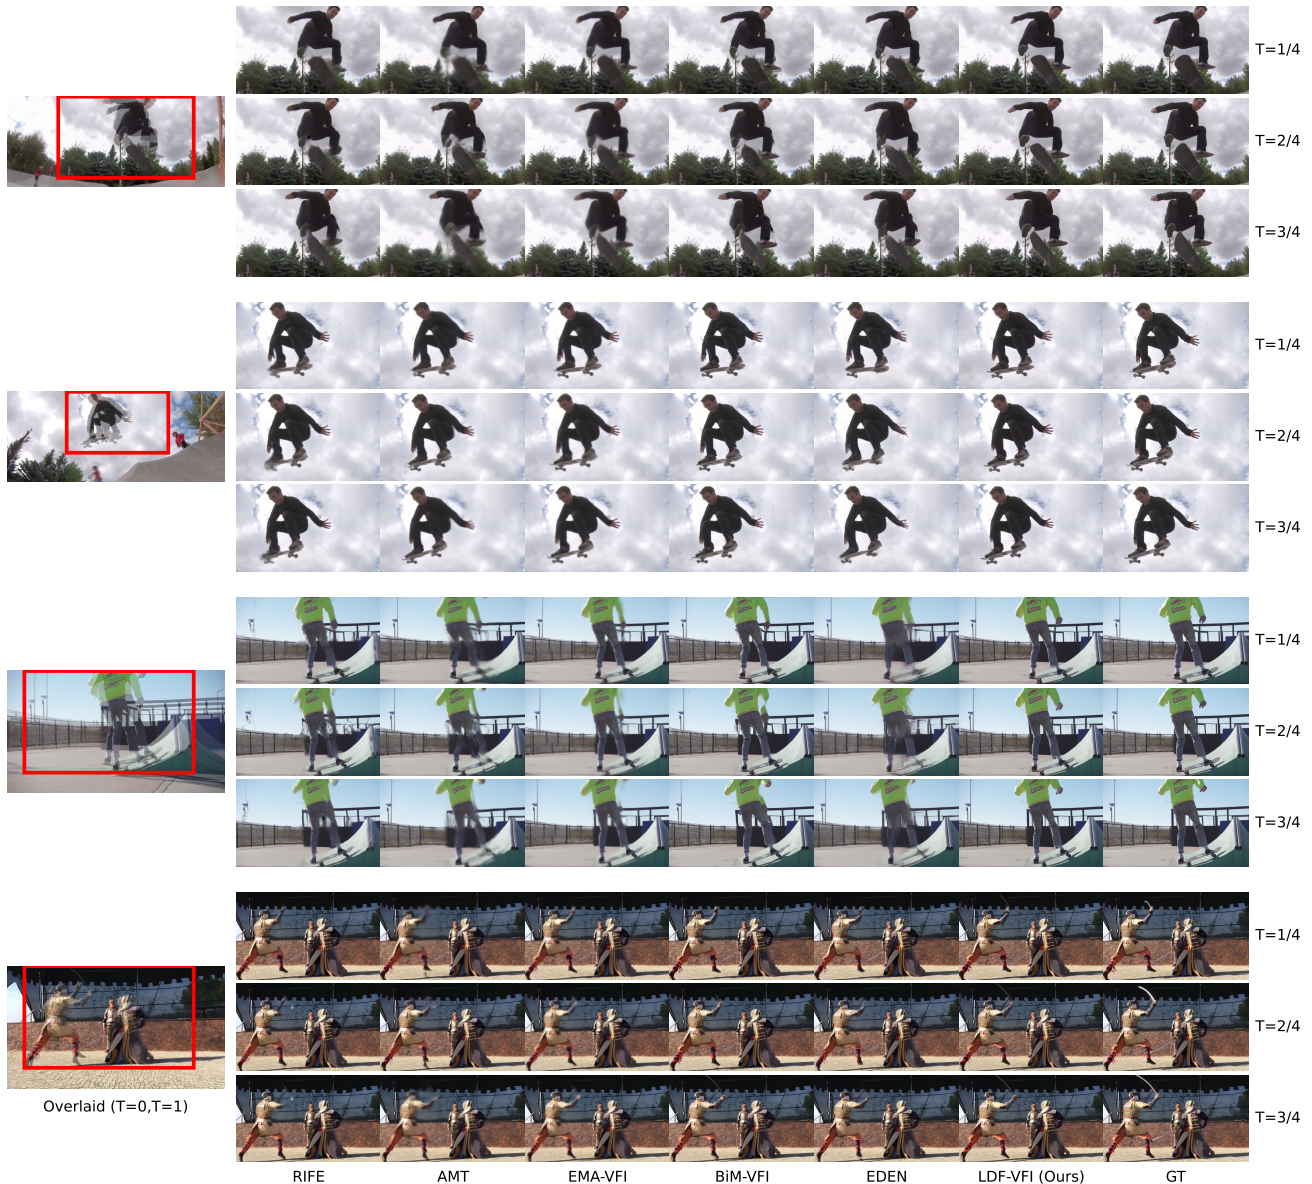

**Figure A1.** Qualitative comparisons of  $16\times$  interpolation on SNU-FILM-entire benchmark.

**More visualization** We provide additional visual comparisons in Figure A1.

**Impact of temporal chunk length** Table A1 compares chunk sizes under similar training computation (32K steps for length 5 vs. 8K steps for length 20). A longer chunk (20) improves temporal continuity, e.g., reducing X4K FVD from 510.63 to 121.29.

**Table A1.** Impact of temporal chunk length under similar total computation.

| Temporal chunk   | SNU-FILM-8 $\times$ |                  | X4K-16 $\times$    |                  |
|------------------|---------------------|------------------|--------------------|------------------|
|                  | LPIPS $\downarrow$  | FVD $\downarrow$ | LPIPS $\downarrow$ | FVD $\downarrow$ |
| Length 5         | <b>0.059</b>        | 42.15            | 0.198              | 510.63           |
| <b>Length 20</b> | 0.066               | <b>24.87</b>     | <b>0.126</b>       | <b>121.29</b>    |
